# Supplementary material for: The Role of Extracellular Vesicles (EVs) in Chronic Graft vs. Host Disease, and the Potential Function of Placental Cell-Derived EVs as a Therapeutic Tool
Source: MDPI journal article supplement (doi:10.3390/ijms24098126), 2023-05-01
Supplement: s1 [file s1]

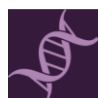

**Supplementary material (SM)**  
**Supplementary Table S1: Antibodies list**

| <b>Antibodies and kit for western blot</b> | <b>Concentration</b> | <b>Vender</b> | <b>Cat. number</b> |
|--------------------------------------------|----------------------|---------------|--------------------|
| Mouse anti human CD63                      | 1:1000               | abcam         | ab59479            |
| Mouse anti human CD81                      | 1:1000               | abcam         | ab79559            |
| Anti-interferon gamma (IFN $\gamma$ )      | 1:1000               | abcam         | ab133566           |
| Rabbit anti human TNF alpha                | 1:1000               | abcam         | ab215188           |
| Rabbit anti human Placental lactogen       | 1:25000              | abcam         | ab137099           |
| Rabbit anti human TGF $\beta$              | 1:1000               | abcam         | ab215715           |
| Rabbit anti human SMAD7                    | 1:1000               | abcam         | ab216428           |
| Ab5694 anti human aSMA                     | 1:1000               | abcam         | Ab5694             |
| Mouse anti human Actin                     | 1:1000               | Biomedical    | 691001MP           |
| Anti-mouse                                 | 1:5000               | Jackson       | 115-035-146        |
| Anti-rabbit                                | 1:5000               | Jackson       | 111-035-144        |
| <b>Antibodies for Flow Cytometry</b>       | <b>Color</b>         | <b>Vender</b> | <b>Cat. number</b> |
| <b>(mouse anti human)</b>                  |                      |               |                    |
| Mouse IgG1 isotype control                 | FITC                 | BD            | 345815             |
| Mouse IgG1 isotype control                 | PE                   | BD            | 400112             |
| Mouse IgG1 isotype control                 | APC                  | BD            | 555751             |
| Anti CD73                                  | APC                  | BD            | 560874             |
| Anti CD105                                 | APC                  | BD            | 560839             |
| Anti CD29                                  | APC                  | BD            | 559883             |
| Anti PDL-1                                 | APC                  | BD            | 564715             |
| Anti HLADR (MHC class II)                  | APC                  | BD            | 559868             |

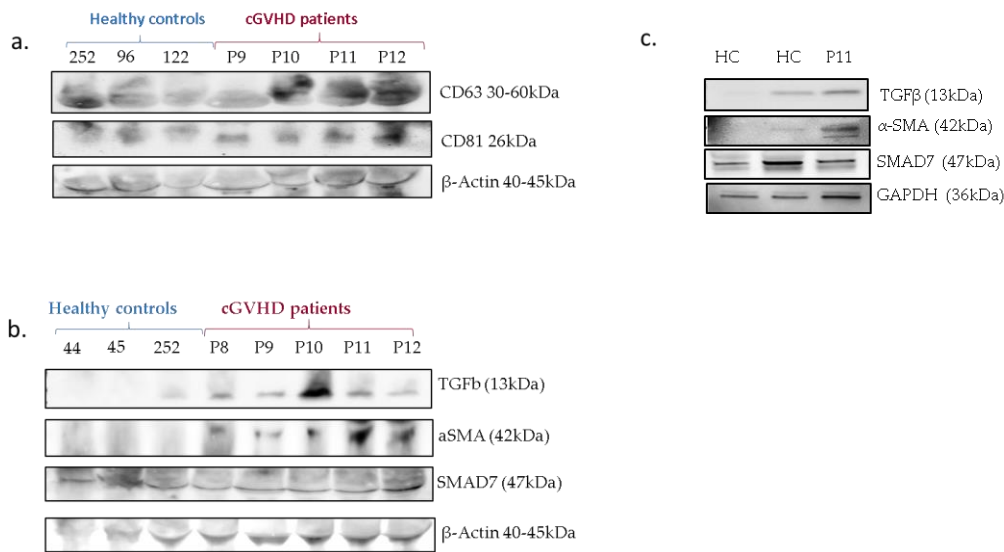

Supplementary Figure S1: Representative images of gels.

Patients and healthy controls EVs exosome markers CD63, CD81 expression compared to  $\beta$ -actin (a). Patients and healthy controls EVs content of fibrosis related proteins: TGF- $\beta$ , SMAD7,  $\alpha$ SMA and their control  $\beta$ -actin (b). Effects of EVs pellet, isolated from 150ul platelet-poor plasma (PPP) of patients with cGVHD and HC on dermal fibroblast (NHDF) cells. Fibrosis-related protein expression TGF $\beta$ , SMAD7,  $\alpha$ SMA and their control GAPDH (c).

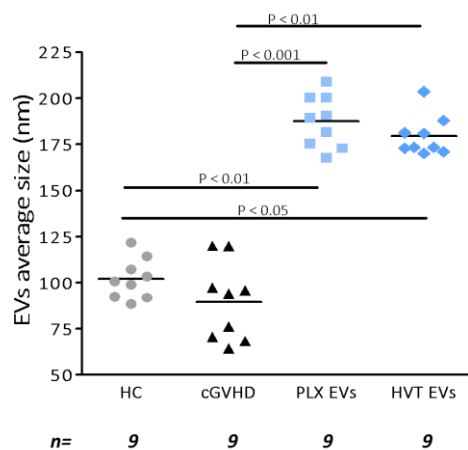

Supplementary Figure S2: EVs obtained from platelet-poor plasma (PPP) of patients with cGVHD or HC were much smaller than EVs obtained from placental cell cultures.

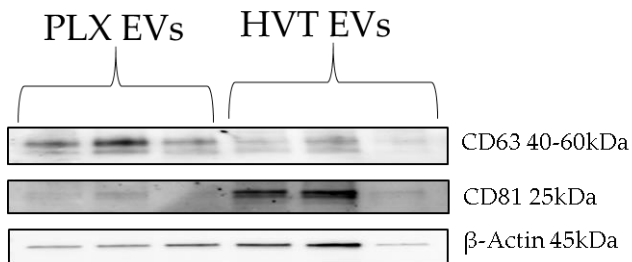

Supplementary Figure S3. Placenta EVs exosome markers expression

Representative gels of PLX and HVT EVs exosome markers CD63, CD81 and their loading control β-actin.

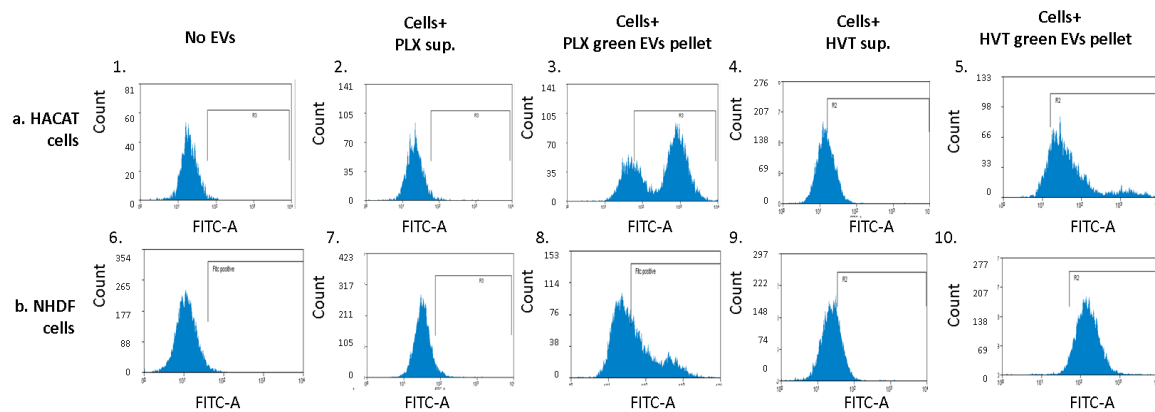

Supplementary Figure S4: Placenta EV and dermal cells interaction.

Green EV pellets isolated from Calcein-AM-labeled placental PLX and HVT cells or their supernatant fluid (SUP) were added to non-stained dermal cells: HACAT (a) and NHDF cells (b) for two hours and then washed. The cells were then analyzed with flow cytometry for the percent of FITC positive cells and compared to non-treated cells.

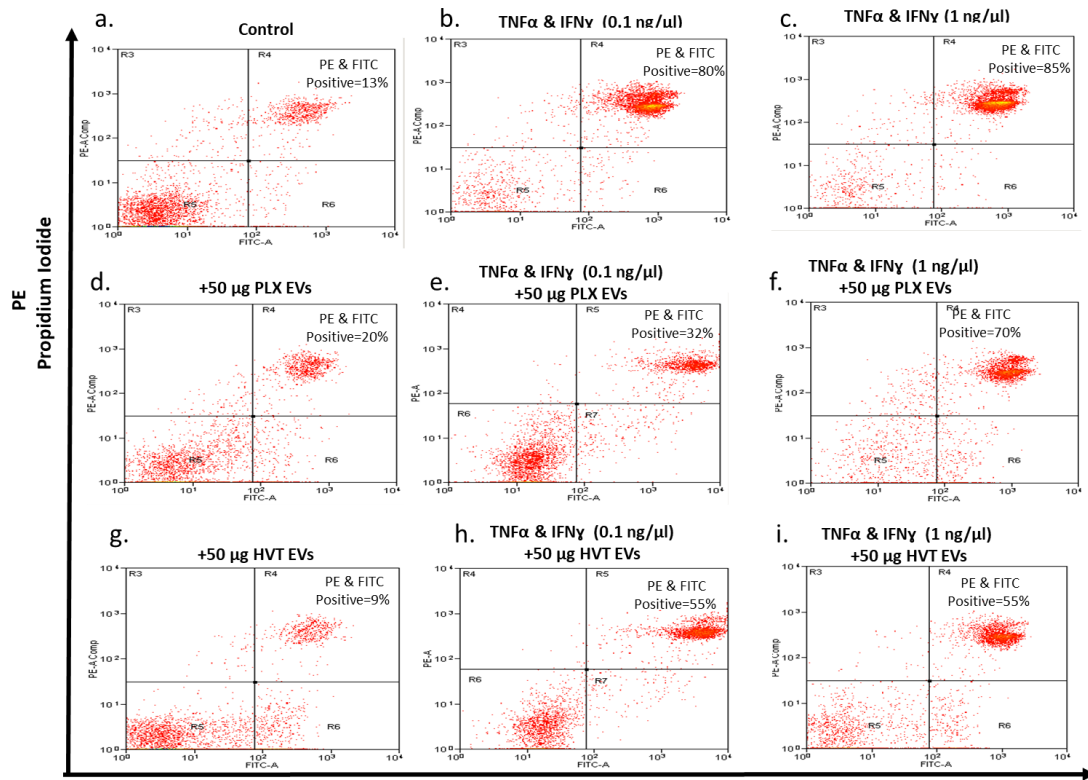

Supplementary Figure S5: The anti apoptotic effects of placental EVs on cytokines induced HACAT cells. The effects of the cytokines on cell viability were measured after 48h of treatment and evaluated by Annexin/PI assay. Representative histograms for : no treated cells (control) (a). Cytokines stimulated cells (TNF $\alpha$  and IFN $\gamma$  0.1 and 1ng/ $\mu$ l) (b,c) ; cells treated with PLX EVs only (d), or combined with (TNF $\alpha$  and IFN $\gamma$  (0.1 and 1ng/ $\mu$ l) (e,f) respectively. Cells treated with HVT EVs only (g), or combined with (TNF $\alpha$  and IFN $\gamma$  0.1 and 1ng/ $\mu$ l) (h, i) respectively.

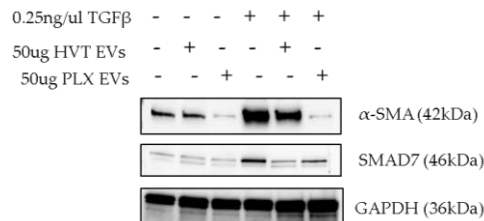

Supplementary Figure S6: Dermal fibroblast (NHDF) cells were exposed to TGF $\beta$  with or without the addition of PLX EVs or HVT EVs. The gel images of fibrotic proteins SMAD7,  $\alpha$ SMA and their control  $\beta$ -actin are presented).
